# Supplementary material
Source: PubMed Central journal article supplement (PMC2672886)
Supplement: embor20098-s1.pdf [file embor20098-s1.pdf]

Supplementary information for

**“Activation of RXR/PPAR heterodimers by organotin environmental endocrine disruptors”**

Albane le Maire, Marina Grimaldi, Dominique Roecklin, Sonia Dagnino, Valérie Vivat-Hannah, Patrick Balaguer and William Bourguet

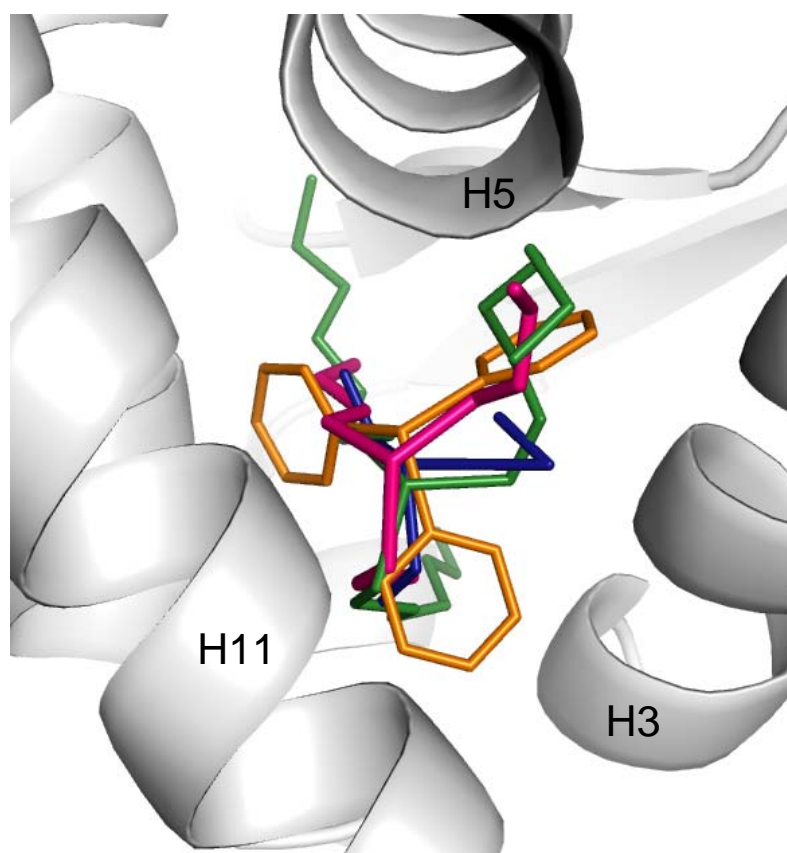

**Fig S1** Comparison of the interaction between RXR $\alpha$  LBD and organotins. Superposition of TBT-A (pink), TPT (triphenyltin, orange), TET (triethyltin, blue) and TOT (trioctyltin, green) in stick representation in the TBT binding pocket shown in white.

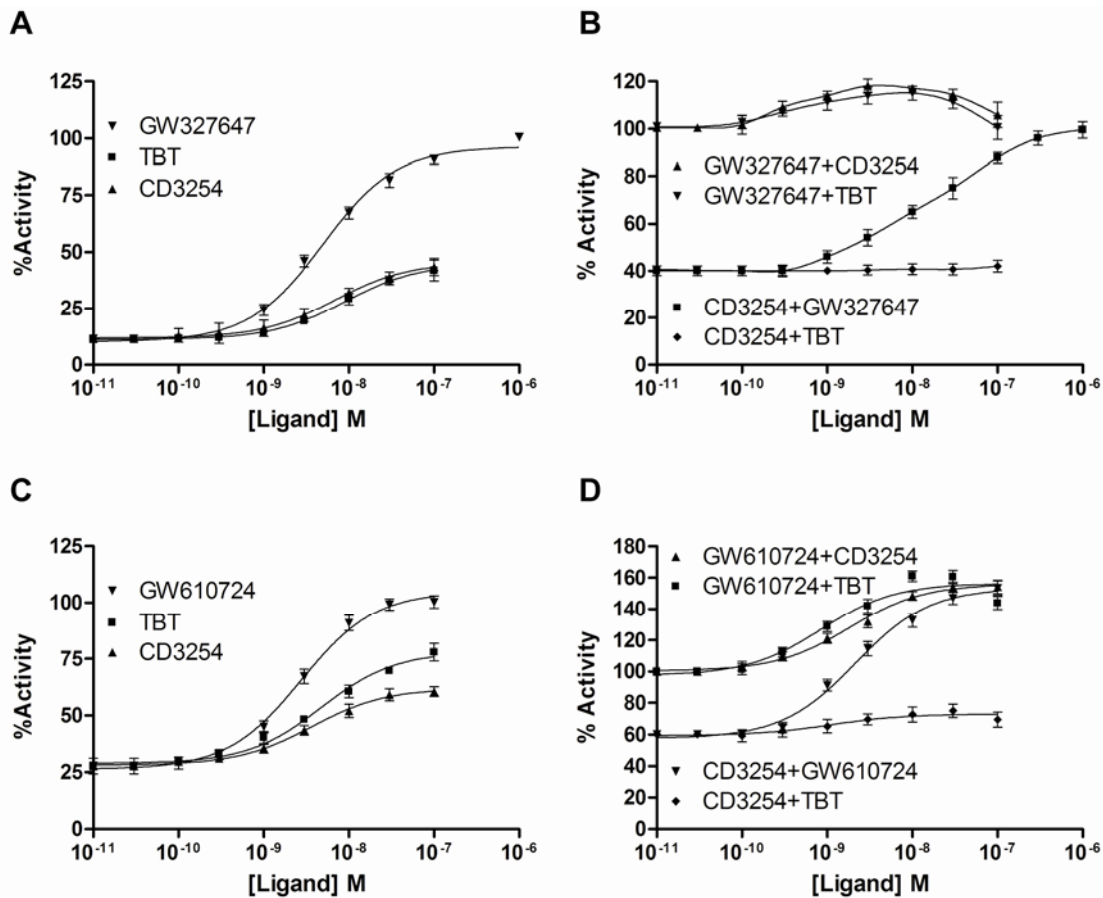

**Fig S2** TBT activates RXR/PPAR $\alpha$  and RXR/PPAR $\delta$  heterodimers. **(A)** Stably transfected HELN PPAR $\alpha$  cells were incubated with increasing concentrations of GW327647, CD3254 or TBT to measure their effect on the transcriptional activity of the heterodimer formed by Gal4-PPAR $\alpha$  and endogenous RXR. **(B)** To measure the specific effect of the organotin on PPAR $\alpha$  and RXR, GW327647, CD3254 or TBT were also tested in the presence of saturating concentrations of RXR (CD3254; 0.1  $\mu$ M) or PPAR $\alpha$  (GW327647; 1  $\mu$ M) specific ligands. 100% activity corresponds to the activity obtained with 1  $\mu$ M GW327647. **(C)** and **(D)** Same experiments with HELN PPAR $\delta$  cells and GW610724 as the PPAR $\delta$  specific agonist. To measure the specific effect of the organotin on PPAR $\delta$  and RXR, GW610724, CD3254 or TBT were tested in the presence of saturating concentrations of RXR (CD3254; 0.1  $\mu$ M) or PPAR $\delta$  (GW610724; 0.1  $\mu$ M) specific ligands.

**Table S1** Data collection and refinement statistics

---

| <b>Data collection</b>                |                          |
|---------------------------------------|--------------------------|
| Space group                           | P43212                   |
| Cell dimensions a, b, c (Å)           | 64.03, 64.03, 111.88     |
| Resolution range (Å)                  | 30.77-1.90 (2.00-1.90) * |
| $R_{\text{sym}}$                      | 0.062 (0.455) *          |
| I/ $\sigma$ I                         | 25.9 (4.3) *             |
| Completeness, %                       | 98.0 (97.2) *            |
| Redundancy                            | 8.8 (9.2) *              |
| <b>Refinement</b>                     |                          |
| Resolution range (Å)                  | 28.63-1.90               |
| Reflections used in refinement        | 17, 579                  |
| $R$ (%) / $R_{\text{free}}$ (%)       | 19.0 / 22.5              |
| Total number of atoms                 | 1,960                    |
| No. protein atoms                     | 1,676                    |
| No. ligand atoms                      | 26                       |
| No. water molecules                   | 166                      |
| Average $B$ -factor (Å <sup>2</sup> ) | 25.2                     |
| Protein $B$ -factor (Å <sup>2</sup> ) | 24.2                     |
| Ligand $B$ -factor (Å <sup>2</sup> )  | 21.6                     |
| Water $B$ -factor (Å <sup>2</sup> )   | 33.2                     |
| Rmsd from ideality                    |                          |
| Bond lengths (Å)                      | 0.011                    |
| Bond angles (°)                       | 1.206                    |
| Ramachandran plot                     |                          |
| Most-favored regions (%)              | 95.4                     |
| Additionally allowed regions (%)      | 4.1                      |
| Generously allowed regions (%)        | 0.5                      |
| Disallowed regions (%)                | 0.0                      |

---

\*Values in parentheses are for highest resolution shell.

**Table S2** Comparison of the binding pocket properties in RXR $\alpha$ -agonists (9cis-RA and CD3254) and RXR $\alpha$ -organotins (TBT, TPT, TET and TOT) complexes and comparison of the agonist ligands and organotin compounds ability to bind and activate RXR $\alpha$ . Ligand volumes were calculated using Vega ZZ (Pedretti et al., 2004). Organotins were manually docked in the TBT binding pocket and the complexes were energy-minimized using REFMAC5 from the CCP4 suite (CCP4, 1994). Protein ligand contacts (cutoff 4.2Å) were evaluated using CONTACT (CCP4, 1994).

| Ligand               | Ligand volume (Å <sup>3</sup> ) | Total contact numbers | Type of contacts (covalent/vdw /polar) | Activation and Binding                    |                                                                     |
|----------------------|---------------------------------|-----------------------|----------------------------------------|-------------------------------------------|---------------------------------------------------------------------|
|                      |                                 |                       |                                        | EC <sub>50</sub> of GAL-RXR activity (nM) | IC <sub>50</sub> for competition with [ <sup>3</sup> H]9cis-RA (μM) |
| TBT <sup>a</sup>     | 233                             | 49                    | 1 / 49 / 0                             | 14.4 <sup>e</sup>                         | 0.468 <sup>e</sup>                                                  |
| 9cis-RA <sup>b</sup> | 319                             | 74                    | 0 / 69 / 5                             | 10.2 <sup>e</sup>                         | 0.107 <sup>e</sup>                                                  |
| CD3254 <sup>c</sup>  | 352                             | 107                   | 0 / 100 / 7                            | 10.0 <sup>f</sup>                         | -                                                                   |
| TPT <sup>d</sup>     | 245                             | 82                    | 1 / 81 / 0                             | 13.9 <sup>e</sup>                         | 0.527 <sup>e</sup>                                                  |
| TET <sup>d</sup>     | 131                             | 21                    | (1) / 20 / 0                           | not detectable <sup>e</sup>               | 6.76 <sup>e</sup>                                                   |
| TOT <sup>d</sup>     | 436                             | 103                   | (1) / 102 / 0                          | not detectable <sup>e</sup>               | >10 <sup>e</sup>                                                    |

<sup>a</sup> The RXR $\alpha$ -TBT complex is described in this study.

<sup>b</sup> PDB code 1FBY (Egea et al., 2000).

<sup>c</sup> The structure of RXR $\alpha$ -CD3254 has been solved but not yet published (our results).

<sup>d</sup> These complexes were modeled from the structure of RXR $\alpha$ -TBT complex. Number and type of contacts are in italics to emphasize that they are only estimations.

<sup>e</sup> Nakanishi et al., 2005

<sup>f</sup> Nahoum et al., 2007

## Supplementary METHODS

**Preparation of stable PPAR cell lines.** HGELN hPPAR $\alpha$ , hPPAR $\delta$  and hPPAR $\gamma$  cell lines were generated in two steps. Firstly, we generated the HGELN cell line by transfecting HeLa cells with the pGAL4RE-ERE- $\beta$ Glob-Luc-SVNeo plasmid. Secondly, we transfected HGELN cells with pGAL4-PPAR-puro plasmids. pGAL4RE-ERE- $\beta$ Glob-Luc-SVNeo contains a luciferase gene driven by a yeast activator GAL4 and an estrogen receptor binding site in front of the  $\beta$ -globin promoter and a neomycin phosphotransferase gene under the control of the SV40 promoter. In pGAL4-PPAR-puro (Seimandi et al, 2005), the encoded chimeric GAL4-PPAR proteins consists of 1-147 GAL4 amino acids followed by the human PPAR LBDs. (Puromycin N-acetyl transferase selection marker expression confers resistance to puromycin.

## References

- CCP4. (1994) Collaborative Computational Project Number 4. *Acta Crystallogr D Biol Crystallogr*, **50**: 760-763
- Egea, P.F., Mitschler, A., Rochel, N., Ruff, M., Chambon, P. and Moras, D. (2000) Crystal structure of the human RXR $\alpha$  ligand-binding domain bound to its natural ligand: 9-cis retinoic acid. *EMBO J*, **19**: 2592-2601
- Nahoum, V., Perez, E., Germain, P., Rodriguez-Barrios, F., Manzo, F., Kammerer, S., Lemaire, G., Hirsch, O., Royer, C.A., Gronemeyer, H., de Lera, A.R. and Bourguet, W. (2007) Modulators of the structural dynamics of the retinoid X receptor to reveal receptor function. *Proc Natl Acad Sci U S A*, **104**: 17323-17328
- Nakanishi, T., Nishikawa, J., Hiromori, Y., Yokoyama, H., Koyanagi, M., Takasuga, S., Ishizaki, J., Watanabe, M., Isa, S., Utoguchi, N., Itoh, N., Kohno, Y., Nishihara, T. and Tanaka, K. (2005) Trialkyltin compounds bind retinoid X receptor to alter human placental endocrine functions. *Mol Endocrinol*, **19**: 2502-2516
- Pedretti, A., Villa, L. and Vistoli, G. (2004) Vega - An open platform to develop chemo-bio-informatics applications, using plug-in architecture and script" programming. *J.C.A.M.D*, **18**: 167-173
- Seimandi M, Lemaire G, Pillon A, Perrin A, Carlván I, Voegel JJ, Vignon F, Nicolas JC, Balaguer P (2005) Differential responses of PPAR $\alpha$ , PPAR $\delta$ , and PPAR $\gamma$  reporter cell lines to selective PPAR synthetic ligands. *Anal Biochem* **344**: 8-15
